# Supplementary material for: Embedding a Culture of Active Learning in Cardiorespiratory Physiotherapy Education- Hybrid Team-Based Learning(H-TBL)
Source: Preprints.org preprint supplement (doi:10.20944/preprints202008.0463.v1), 2020-08-20
Supplement: Supplementary file 1 [file supplementary]

## Supplementary materials- Appendix 1 - Figures

Figure 1

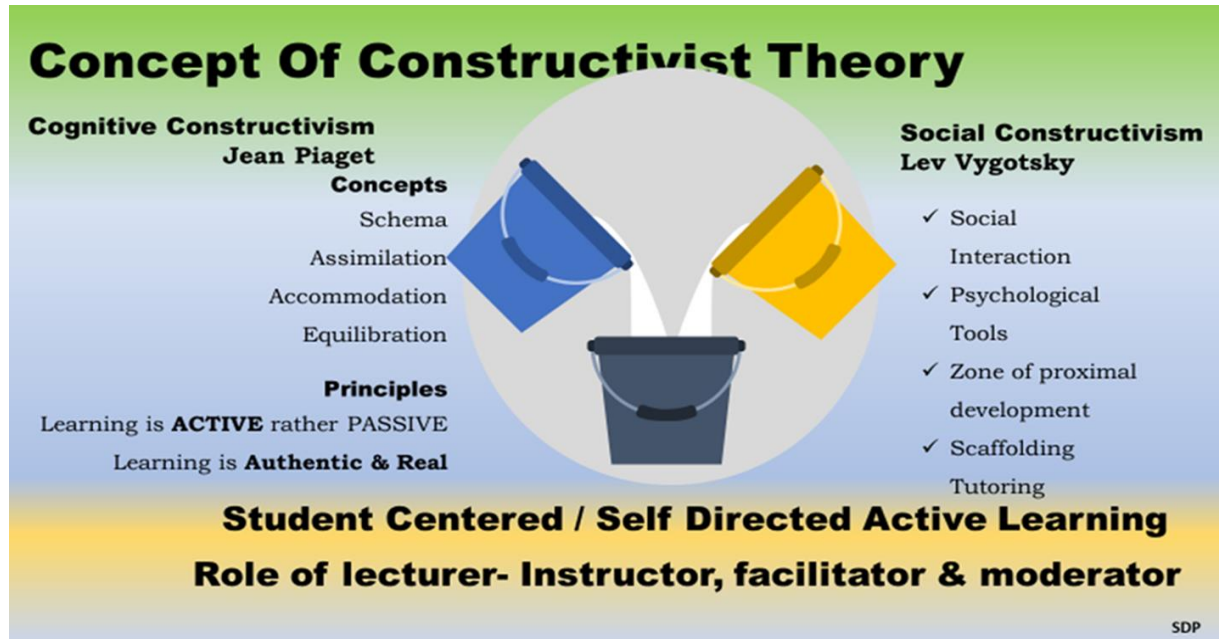

**Figure 2**

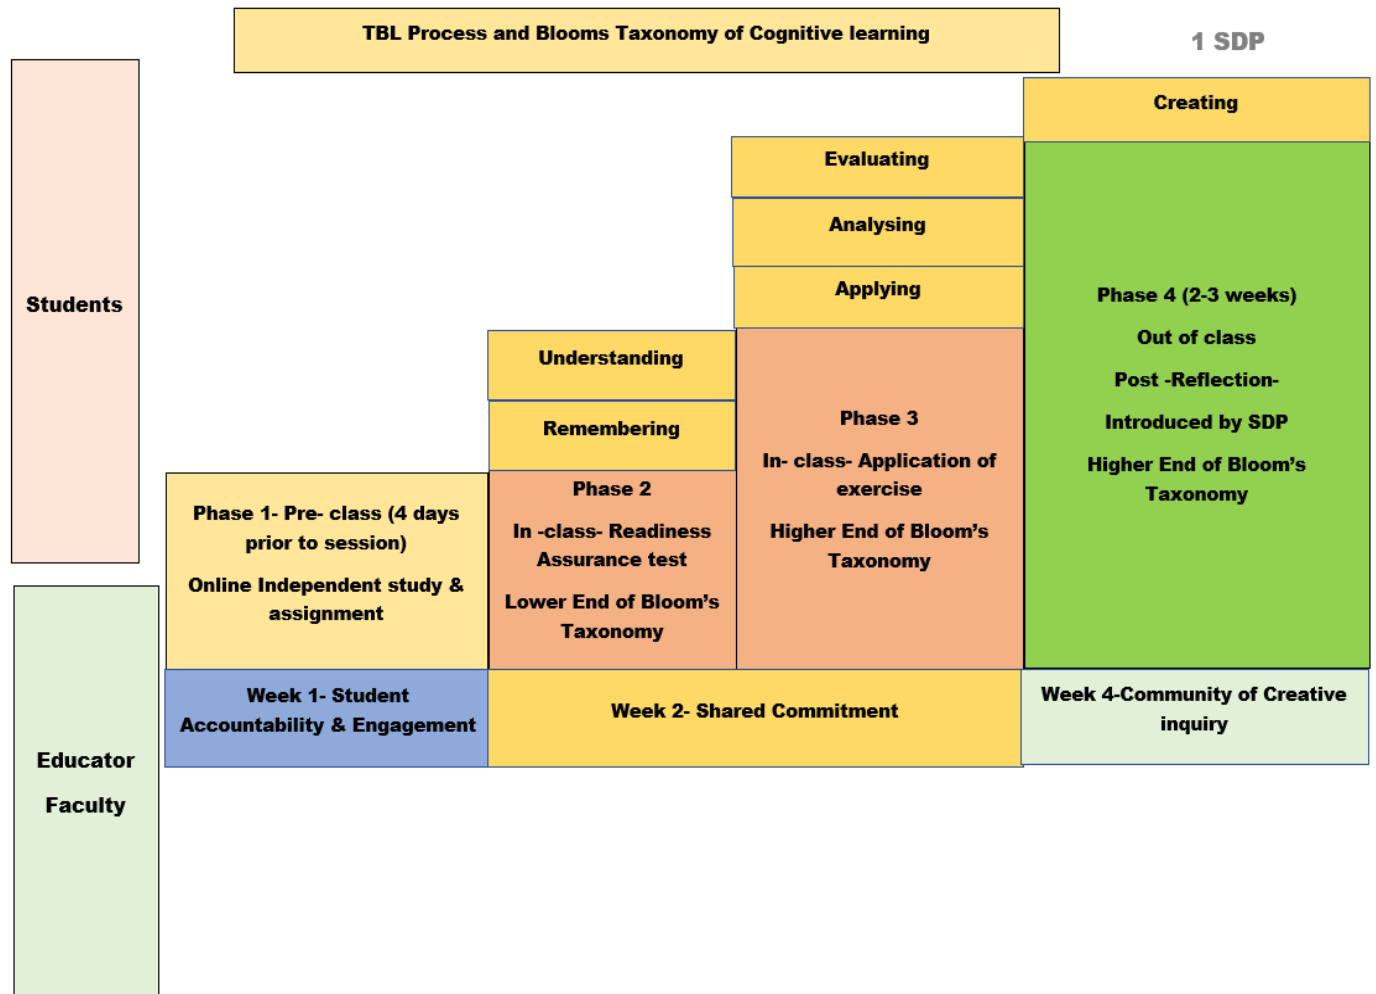

Figure 3

The image shows two screenshots of a courseware structure page for HC2126 Problem Definition COPD. The top screenshot is for Section 1, and the bottom screenshot is for Section 2. Both screenshots feature the Cardiff University logo and the course title. Section 1 details include a launch date of 25th Nov 2019, a description of the content (Introduction to COPD, diagnosis & management, co-morbidities and Palliative care), a virtual case study challenge, and an Editorial review. It also specifies the time required to complete the section (40-60 mins) and a deadline to complete Section 1 before the 29th Nov lecture session. Section 2 details include a launch date of 29th Nov 2019 in the lecture session, a description of the task (reading a journal article and producing a creative piece), and a deadline of 9th December 2019. It also specifies the time to expect on 29th Nov (9.00am - 10.00am, LT2) and describes the team-based learning experience.

**CARDIFF UNIVERSITY**  
**HEALTH SCHOOL**  
**CARDIFF**

## HC2126 Problem Definition COPD

### Coursework Structure

**Section 1: This section will be launched on 25th Nov 2019.**

This section comprises of: Introduction to COPD, diagnosis & management, co-morbidities and Palliative care. This section ends with a virtual case study challenge and an Editorial review to enhance your understanding of COPD.

***How much time I require to complete Section 1?***

This Section1 comprises 4 short videos each 5-7 mins, Case study challenge and some MCQ's. You should be able to complete this section in between 40- 60 mins depending on your pace of learning.

**It is important to complete SECTION 1 before your lecture session on 29th Nov in order to be able to complete SECTION 2 in your lecture session.**

**CARDIFF UNIVERSITY**  
**HEALTH SCHOOL**  
**CARDIFF**

## HC2126 Problem Definition COPD

### Coursework Structure

**Section 2: Critical reflection: This section will be launched on 29th Nov 2019 in your lecture session.**

You are provided with one Journal article related to COPD in Learning Central. You are required to read and produce a creative piece for a given question. Your creative piece could be a "Blog" not exceeding 50 words in a Word document, or a "PowerPoint Presentation" not exceeding 5 power point slides or an "infographics". You should submit your creative work no later than **9th December 2019** using the Turnitin link provided.

**What to expect on 29th Nov in your lecture session - between 9.00am -10.00am, LT2.**

You will experience a team based learning that includes but not limited to discussion, debate and presentation on multidisciplinary themes. Be prepared to contribute and display your creative side towards this lecture. To facilitate an effective use of our time, I would request everyone a prompt presence 5 -10 mins earlier for your 9.00 am session on 29th Nov.

**Figure 4**

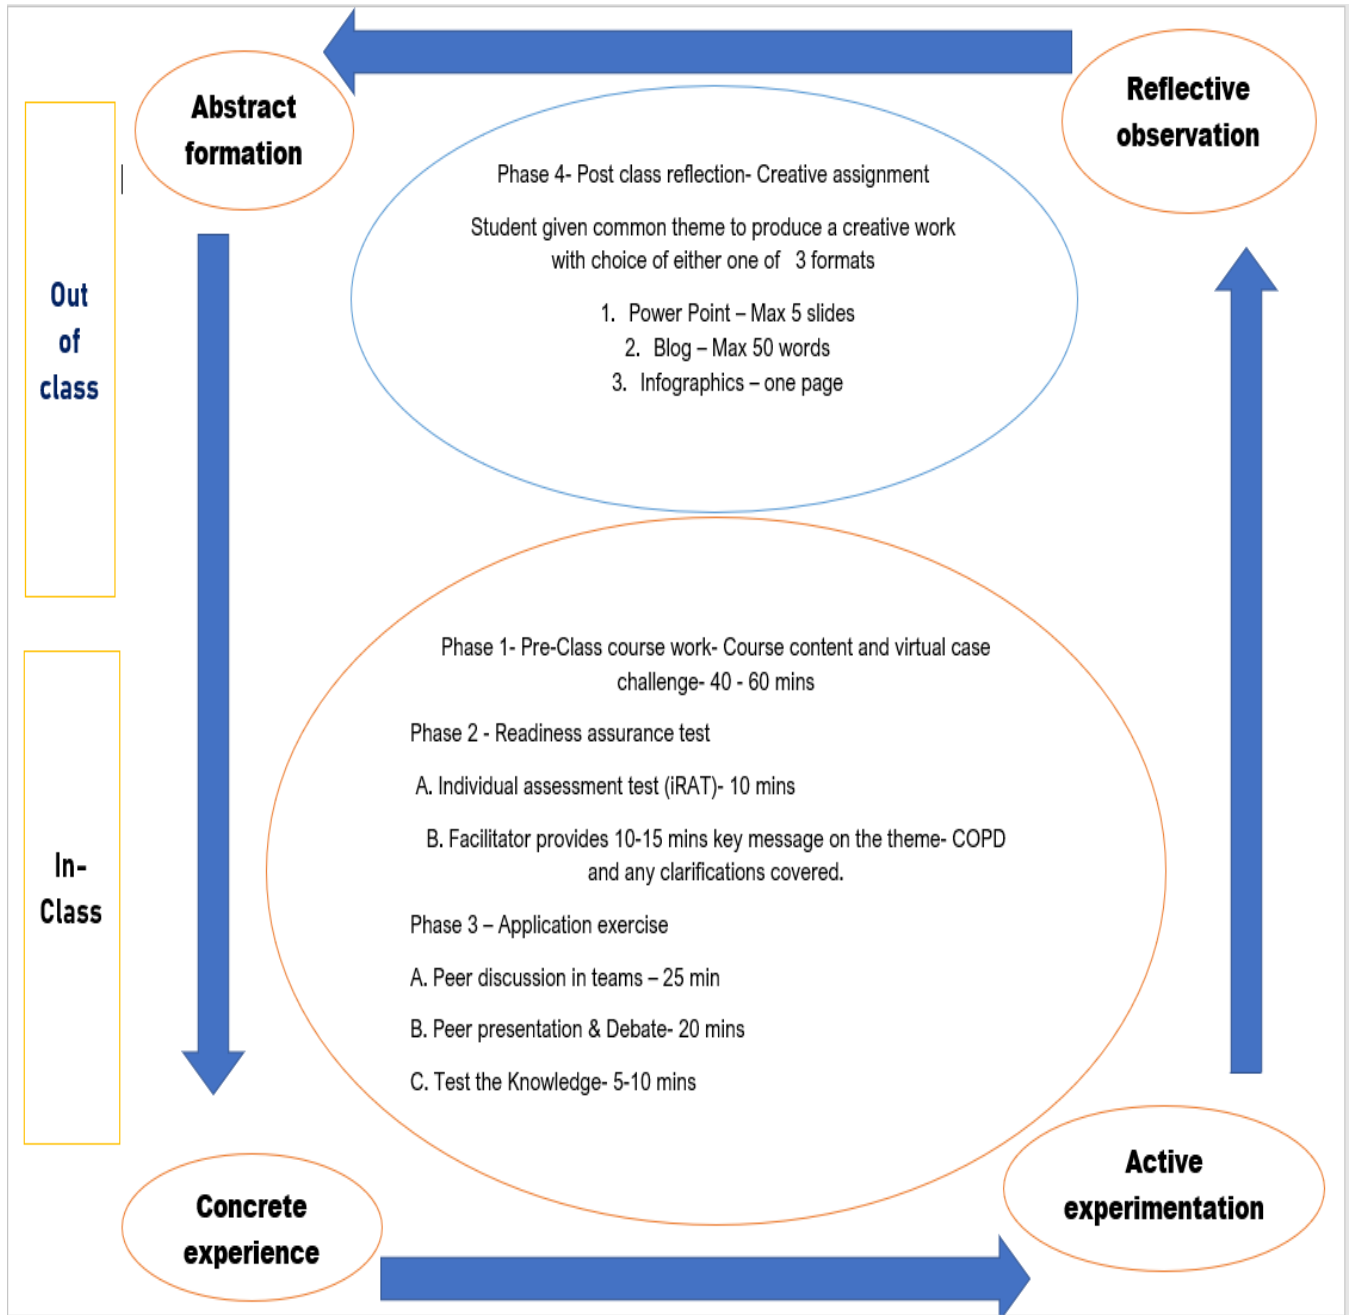

**Figure 5**

## Intended learning Outcomes

- **Assess and Integrate** the learning obtained from your COPD pre course work(online learning), apply these lessons to critical reflection of COPD exacerbations & management (Readiness test)
- Understand the importance of **ground rules** prior to the session to facilitate confidentiality and nurture critical self-reflection.
- Explore the **cognitive reasoning skills** used by themselves and other learners behind COPD management to enhance learning experience for all.
- Emphasize enhanced **Verbal & Non verbal communication skills** between and within multidisciplinary team.

**Figure 6**

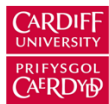

## Your Timelines for this Session

**COPD Readiness Test**  
10mins

**Team Based Discussion**  
20 mins

**Peer Presentation**  
20 mins

**Test my Knowledge** 5-10 mins

**Figure 7**



# Rules of Engagement

---

- ❖ **Contract- This is not an assessment!**
- ❖ **Curious Stance throughout session**
- ❖ **Reflect with evidence based practice**
- ❖ **Be open for new thoughts**
- ❖ **Debate promoted**
- ❖ **Be critical with respect**
- ❖ **Challenge ideas but don't be defensive**

29/11/2019 SDP 3

**Figure 8**

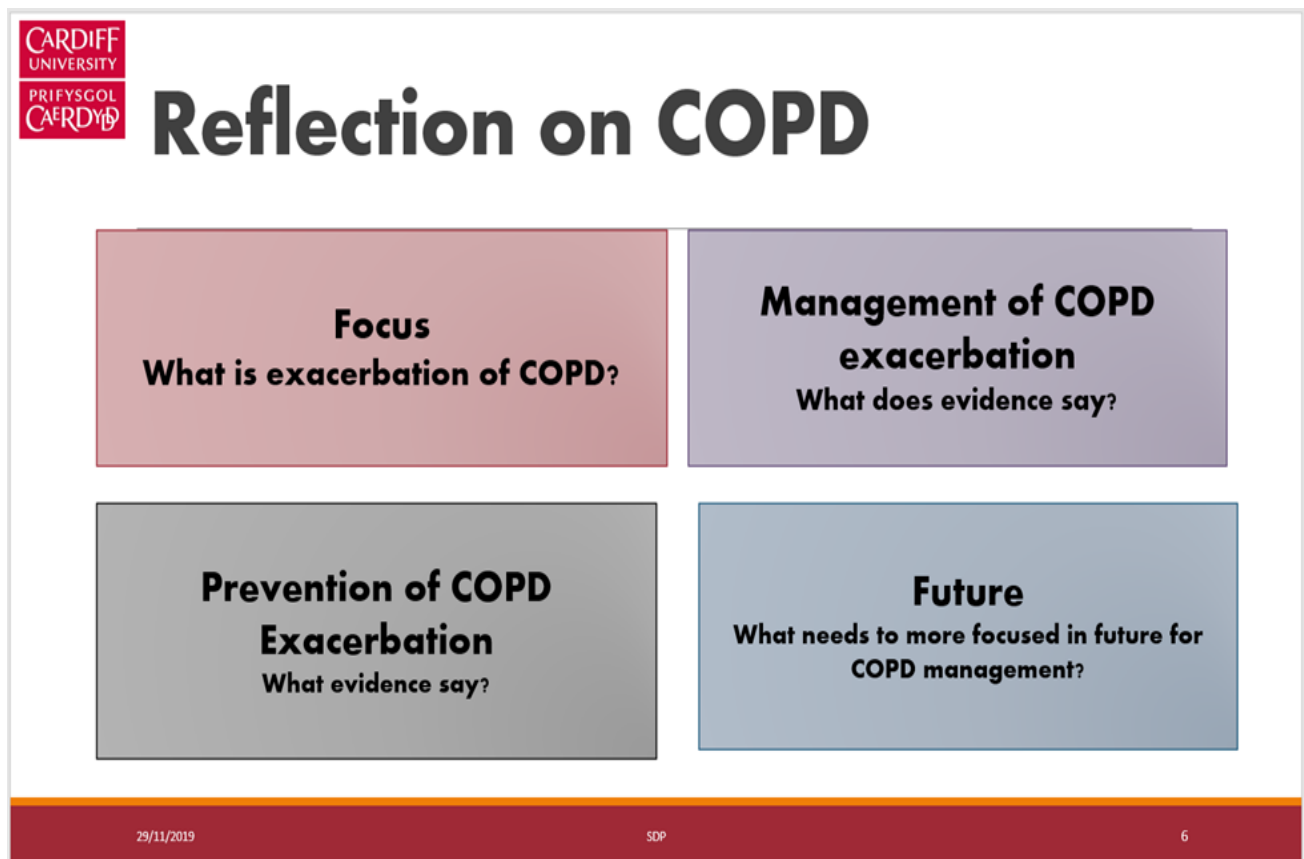



**Figure 9**

**Rubric for Students reflection**

|                     | Above Expectations                                                                                                                                                                   | Meets Expectations                                                                                                                                      | Near Expectations                                                                                                                                                                                            | Below Expectations                                                                  |
|---------------------|--------------------------------------------------------------------------------------------------------------------------------------------------------------------------------------|---------------------------------------------------------------------------------------------------------------------------------------------------------|--------------------------------------------------------------------------------------------------------------------------------------------------------------------------------------------------------------|-------------------------------------------------------------------------------------|
|                     | 4                                                                                                                                                                                    | 3                                                                                                                                                       | 2                                                                                                                                                                                                            | 1                                                                                   |
| Reflective Thinking | The reflection explains the student's own thinking and learning processes, as well as directions for future learning.                                                                | The reflection explains the student's thinking about his/her own learning processes.                                                                    | The reflection attempts to demonstrate thinking about learning but is vague and/or unclear about the personal learning process.                                                                              | The reflection does not address the student's thinking and/or learning.             |
| Analysis            | The reflection demonstrates an in-depth analysis of the learning experience, the value of the derived learning to self or others, appreciation of the subject related to discipline. | The reflection demonstrates an analysis of the learning experience, the value of the derived learning to self or others.                                | The reflections attempt a shallow analysis and value of the learning to the student or others is vague and/or unclear.                                                                                       | The reflection does not move beyond a description of the learning experience.       |
| Making Connections  | The reflection articulates multiple connections between this learning experience and content from other courses, past learning, life experiences and/or future goals.                | The reflection articulates connections between this learning experience and content from other courses, past learning experiences, and/or future goals. | The reflection attempts to articulate connections between this learning experience and content from other courses, past learning experiences, or personal goals, but the connection is vague and/or unclear. | The reflection does not articulate any connection to other learning or experiences. |

<https://www.scribd.com/document/333036195/portfolio-rubric-for-reflection-print-copy>

Figure 10

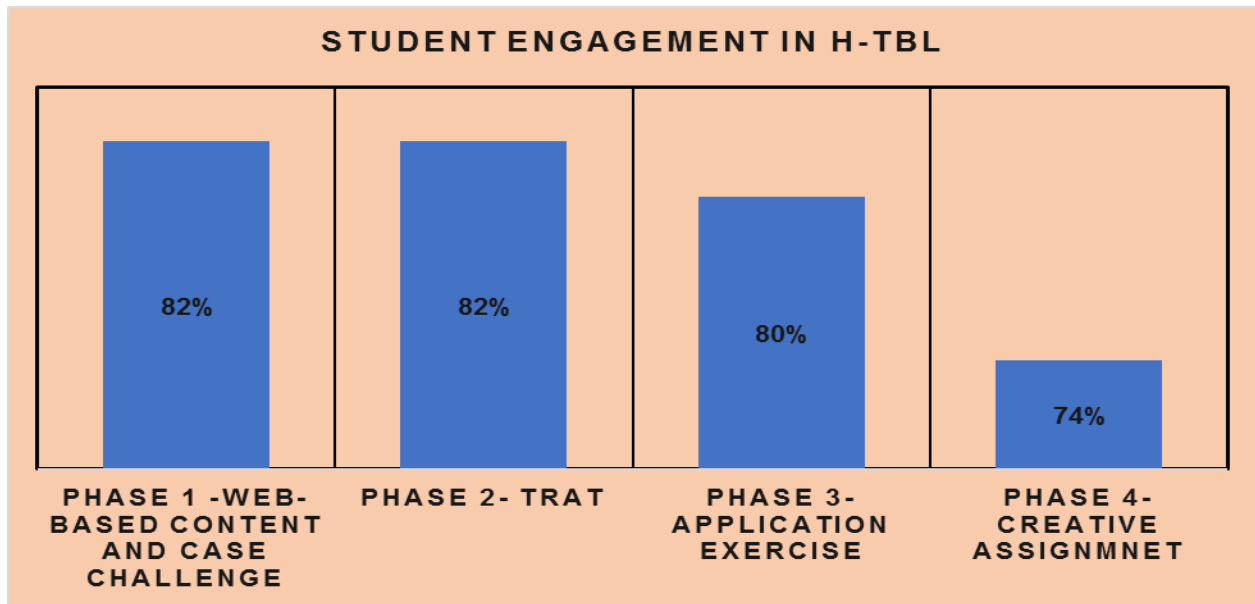

Figure 11

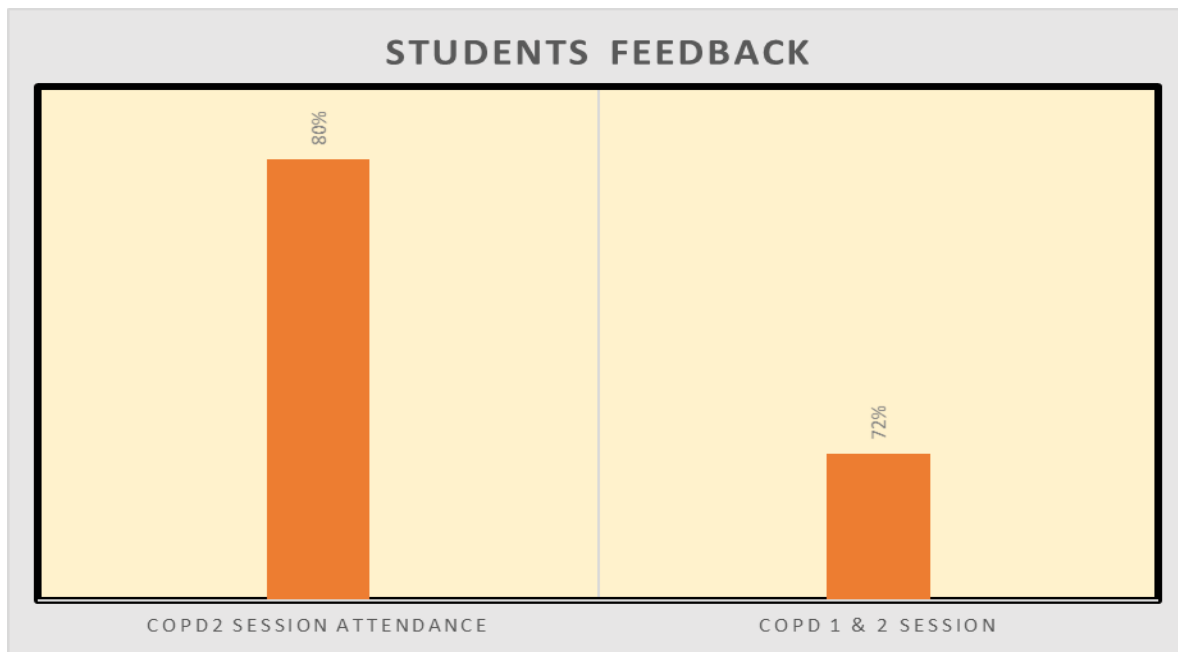

## Supplementary Materials

### Appendix 2- Table1

#### Team Readiness awareness test (tRAT)

| No | Questions                                                                                         | Total response | Right response | Percentage |
|----|---------------------------------------------------------------------------------------------------|----------------|----------------|------------|
| 1  | What is COPD?                                                                                     | 37 teams       | 19/37          | 51%        |
| 2  | What is main cause of COPD?                                                                       | 37 teams       | 37/37          | 100%       |
| 3  | COPD comprises of?                                                                                | 37 teams       | 34/37          | 91%        |
| 4  | What are cardinal symptoms of COPD                                                                | 37 teams       | 35/37          | 95%        |
| 5  | Why is exercise tolerance limited in COPD?                                                        | 37 teams       | 20/37          | 54%        |
| 6  | What does COPD management comprise of?                                                            | 37 teams       | 36/37          | 97%        |
| 7  | Which additional investigation gives more information on oxygen needs in COPD patients? 4 choices | 37 teams       | 25/37          | 68%        |
| 8  | COPD patients who experience frequent exacerbations are more likely to also experience            | 37 teams       | 32/37          | 86%        |
| 9  | Exacerbation frequency is the best measure for predicting exacerbation risk – True or false?      | 37 teams       | 18/37          | 47%        |
| 10 | What is the key patient related outcome measures?                                                 | 37 teams       | 30/37          | 81%        |
